# Supplementary material for: fastBMA: scalable network inference and transitive reduction
Source: PubMed Central journal article supplement (PMC5632288; doi:10.1093/gigascience/gix078), 2017-08-22
Supplement: gix078_Response-to-Reviewer-Comments_Revision-2.pdf [file gix078_Response-to-Reviewer-Comments_Revision-2.pdf]

## **Author's Response To Reviewer Comments**

The urls in the main body of the manuscript have been replaced by citations. The main github citation has been changed to the Gigascience Database citation for the supporting data.

I have added the line referring to the Gigascience Database in the available materials and also edited the citation to include the url.
