# Supplementary material for: fastBMA: scalable network inference and transitive reduction
Source: PubMed Central journal article supplement (PMC5632288; doi:10.1093/gigascience/gix078), 2017-08-22
Supplement: gix078_Supp.pdf [file gix078_Supp.pdf]

# Supplemental materials

---

## Algorithm pseudocode

### 1.1 Model generation

```
INPUT: oddsRatio, hashLUT #hash value lookup table
Initialize(activeModels,keepModels,nextModels,evaluatedModels)
Initialize(bitTable[64][65326])
bestConfidence=0
While(activeModels != {} )
  nextModels.clear()
  ForEach model in activeModels #Add a new variable
    ForEach index in variableIndexList
      If(!model.contains(variable))
        If(bitTable.set(model.hash^hashLUT[variable], model.size()+1)){
          newModel=CholeskyInsert(model,variable)
          If(newModel.score < bestscore + 2*log(oddsRatio)
            nextModels.add(newModel)
            If(newModel.confidence < bestConfidence)
              bestConfidence=(newModel.confidence
            EndIf
          Endif;
        EndIf
      EndIf
    EndForeach
  ForEach index in model.variableList #Delete a variable
    If(bitTable(model.hash^hashLUT[index],model.size()-1)
      newModel=CholeskyDelete(model,variable)
      If(newModel.score < bestscore + 2*log(oddsRatio)
        nextModels.add(newModel)
        If(newModel.confidence < bestConfidence)
          bestConfidence=(newModel.confidence)
        EndIf
      EndIf
    EndForeach
  EndForeach
  keepModels.deletePoorModels()
  activeModels.deletePoorModels()
  keepModels.addModels(activeModels)
  nextModels.deletePoorModels()
  activeModels=nextModels;
EndWhile
```

## 1.2 Bit table filter

```
Function bitTable.set (hashValue, modelSize){
  #use upper bits 21-22 combined with modelSize for row index
  row=(hashValue & 0x00300000 >> 16) | (modelSize %16)
  #use lower 16 bits for the column index
  column=hashValue & 0x0000FFFF
  If (!bitValue[row][column])
    bitValue[row][column]=1;
    {return(0)}
  EndIf
  Else
    bitValue[row][column]==1; return(1)
  EndIf
EndFunction
```

## 1.3 Cholesky update

```
Function CholeskyInsert (model,varIndex){
  newModel=model.addVariable(varIndex);
  columnVector=dataMatrixSquaredLookup(varIndex);
  newMatrix=AddColumn(model.matrix,columnVector);
  newModel.matrix=GivensTriangularize(newMatrix);
  newModel.regressionParms=BackSubstitute(newModel.matrix)
  return(newModel)
EndFunction
```

## 1.4 Transitive reduction

```
edgeDistance[]=convertToNegativeLogs(edgeWeights)
edgeList.sortbyEdgeWeights()
Foreach edge in edgeList
  edgeDist=edgeDistance[edge.parent,edge.child]
  dist=findMinDistance(edge.parent,edge.child,edgeDist,edgeDistance)
  If(dist < minDist)
    edgeList.remove(edge)
  EndIf
EndForeach

Function findMinDistance(startNode,endNode,maxDist,edgeDistance)
  Priority Queue Q
  Q.push(endNode)
  While(!Q.empty())
    If(Q.top == startNode)BREAK #found path
    currentNode=Q.pop()
    pathDist=currentNode.pathDistance
    Foreach parentNode in currentNode.parentList
      parentDist=pathDist+edgeDistance[parentNode,currentNode]
      If(parentDist<maxDist)
        Q.Push(parentNode)
        parentNode.pathDistance=parentDist
      EndIf
    EndForeach
  EndWhile
  Return(Q.pop())
```
